# Supplementary material
Source: publisher site journal article supplement (https://www.degruyter.com/publication/journal_key/EDU/downloadAsset/EDU_CFP%20Building%20Bridges%20in%20STEAM%20Education%20in%20the%2021st%20Century.pdf)
Supplement: Supplementary file 1 [file EDU_CFP%20Building%20Bridges%20in%20STEAM%20Education%20in%20the%2021st%20Century.pdf]

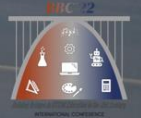

## BUILDING BRIDGES IN STEAM EDUCATION IN THE 21ST CENTURY

### LEAD EDITOR

---

Carla M.A. Pinto, School of Engineering, Polytechnic of Porto, Portugal

### GUEST EDITORS

---

Chris Brownell, Fresno Pacific University in California, USA

Zsolt Lavicza, Johannes Kepler University, Austria

Jorge Mendonça, School of Engineering, Polytechnic of Porto, Portugal

Ana Paula Lopes, Porto Accounting and Business School, Polytechnic of Porto, Portugal

Filomena Soares, Porto Accounting and Business School, Polytechnic of Porto, Portugal

### SCOPE

---

This Special Issue aims at providing an opportunity for all academics to share their personal experiences and projects on STEM/STEAM education in the 21st century.

Main topics include (but are not limited to):

- ▶ Art Education
- ▶ Course Design
- ▶ Distance/Open Education
- ▶ e-Assessment Methodologies
- ▶ Education Technology
- ▶ e-Education: Systems, Design and Technologies
- ▶ Engineering Education
- ▶ Enhancing Learning Experiences in Higher Education
- ▶ Gamification
- ▶ Innovative Learning/Teaching Strategies
- ▶ Innovative Materials and New Tools for Teaching
- ▶ Interaction Strategies
- ▶ Math Education
- ▶ Mobile Learning
- ▶ Multimedia in e-Learning
- ▶ Partnerships in e-Learning
- ▶ Projects and Experiences in e-learning
- ▶ Science Education
- ▶ Serious Games
- ▶ Teaching and Learning Experiences
- ▶ Virtual Learning Environments

### HOW TO SUBMIT

---

Deadline for submissions: **October 31, 2022.**

Predicted publication: **first quarter of 2023.**

Authors are kindly invited to submit their contribution via online submission system Editorial Manager available at: <https://www.editorialmanager.com/openedu/default1.aspx>

Please remember to select a correct article type: SI: to ensure that your manuscript will be processed with the highest priority.

Before completing their manuscript, authors should carefully read the journal's Instruction for Authors located at: [https://www.degruyter.com/publication/journal\\_key/EDU/downloadAsset/EDU\\_Instruction%20for%20Authors.pdf](https://www.degruyter.com/publication/journal_key/EDU/downloadAsset/EDU_Instruction%20for%20Authors.pdf)
